# Supplementary material for: Sympatric speciation in Nicaraguan crater lake cichlid fish
Source: Springer Nature journal article supplement (doi:10.1038/nature04325), 2006-02-01
Supplement: 41586_2006_BFnature04325_MOESM1_ESM.pdf [file 41586_2006_BFnature04325_MOESM1_ESM.pdf]

**Supplementary Table 1** | List of species, sample number (\* marks individuals included in the stomach content analysis and † marks individuals included in the analysis of the pharyngeal jaws), geographic origin and for the Lake Apoyo fish, sampling localities (see Fig. 1b), GenBank accession numbers of mitochondrial control region sequences, and haplotype numbers (see Fig. 2a).

| Species               | Specimen ID | Lake     | Locality | Accession No. | Haplotype |
|-----------------------|-------------|----------|----------|---------------|-----------|
| <i>A. zalius</i>      | Azal001*    | L. Apoyo | I        | DQ230015      | 1         |
| <i>A. zalius</i>      | Azal002     | L. Apoyo | II       | DQ230007      | 1         |
| <i>A. zalius</i>      | Azal003†    | L. Apoyo | II       | DQ230008      | 1         |
| <i>A. zalius</i>      | Azal004     | L. Apoyo | II       | DQ230009      | 1         |
| <i>A. zalius</i>      | Azal005     | L. Apoyo | II       | DQ230010      | 1         |
| <i>A. zalius</i>      | Azal006†    | L. Apoyo | III      | DQ229979      | 1         |
| <i>A. zalius</i>      | Azal007     | L. Apoyo | III      | DQ229981      | 1         |
| <i>A. zalius</i>      | Azal008†    | L. Apoyo | III      | DQ229985      | 1         |
| <i>A. zalius</i>      | Azal009†    | L. Apoyo | III      | DQ229986      | 1         |
| <i>A. zalius</i>      | Azal010†    | L. Apoyo | III      | DQ229987      | 1         |
| <i>A. zalius</i>      | Azal011     | L. Apoyo | III      | DQ229988      | 1         |
| <i>A. zalius</i>      | Azal012†    | L. Apoyo | III      | DQ229989      | 1         |
| <i>A. zalius</i>      | Azal013†    | L. Apoyo | III      | DQ229992      | 1         |
| <i>A. zalius</i>      | Azal014     | L. Apoyo | III      | DQ229993      | 1         |
| <i>A. zalius</i>      | Azal015     | L. Apoyo | III      | DQ229996      | 1         |
| <i>A. zalius</i>      | Azal016     | L. Apoyo | IV       | DQ229964      | 1         |
| <i>A. zalius</i>      | Azal017*    | L. Apoyo | IV       | DQ229965      | 1         |
| <i>A. zalius</i>      | Azal018*    | L. Apoyo | IV       | DQ229966      | 1         |
| <i>A. zalius</i>      | Azal019†    | L. Apoyo | IV       | DQ229969      | 1         |
| <i>A. zalius</i>      | Azal020†    | L. Apoyo | IV       | DQ229970      | 1         |
| <i>A. zalius</i>      | Azal021†    | L. Apoyo | IV       | DQ229972      | 1         |
| <i>A. zalius</i>      | Azal022*†   | L. Apoyo | IV       | DQ229973      | 1         |
| <i>A. zalius</i>      | Azal023*    | L. Apoyo | IV       | DQ229974      | 1         |
| <i>A. zalius</i>      | Azal024*    | L. Apoyo | IV       | DQ229975      | 1         |
| <i>A. zalius</i>      | Azal025*    | L. Apoyo | IV       | DQ229977      | 1         |
| <i>A. zalius</i>      | Azal026     | L. Apoyo | IV       | DQ230019      | 1         |
| <i>A. zalius</i>      | Azal027     | L. Apoyo | IV       | DQ230020      | 1         |
| <i>A. zalius</i>      | Azal028†    | L. Apoyo | IV       | DQ230021      | 1         |
| <i>A. zalius</i>      | Azal029†    | L. Apoyo | IV       | DQ230027      | 1         |
| <i>A. zalius</i>      | Azal030     | L. Apoyo | II       | DQ230048      | 11        |
| <i>A. zalius</i>      | Azal031†    | L. Apoyo | II       | DQ230055      | 12        |
| <i>A. zalius</i>      | Azal032     | L. Apoyo | II       | DQ230056      | 12        |
| <i>A. zalius</i>      | Azal033     | L. Apoyo | III      | DQ230052      | 12        |
| <i>A. zalius</i>      | Azal034†    | L. Apoyo | III      | DQ230053      | 12        |
| <i>A. zalius</i>      | Azal035†    | L. Apoyo | III      | DQ230054      | 12        |
| <i>A. zalius</i>      | Azal036*†   | L. Apoyo | IV       | DQ230051      | 12        |
| <i>A. zalius</i>      | Azal037*†   | L. Apoyo | IV       | DQ230057      | 12        |
| <i>A. zalius</i>      | Azal038†    | L. Apoyo | IV       | DQ230058      | 13        |
| <i>A. citrinellus</i> | Acit039     | L. Apoyo | I        | DQ230011      | 1         |
| <i>A. citrinellus</i> | Acit040†    | L. Apoyo | I        | DQ230012      | 1         |
| <i>A. citrinellus</i> | Acit041     | L. Apoyo | I        | DQ230013      | 1         |
| <i>A. citrinellus</i> | Acit042     | L. Apoyo | I        | DQ230014      | 1         |
| <i>A. citrinellus</i> | Acit043     | L. Apoyo | I        | DQ230016      | 1         |
| <i>A. citrinellus</i> | Acit044     | L. Apoyo | I        | DQ230017      | 1         |
| <i>A. citrinellus</i> | Acit045*†   | L. Apoyo | I        | DQ230018      | 1         |

|                      |           |          |     |          |    |
|----------------------|-----------|----------|-----|----------|----|
| <i>A.citrinellus</i> | Acit046   | L. Apoyo | II  | DQ229997 | 1  |
| <i>A.citrinellus</i> | Acit047   | L. Apoyo | II  | DQ229998 | 1  |
| <i>A.citrinellus</i> | Acit048   | L. Apoyo | II  | DQ229999 | 1  |
| <i>A.citrinellus</i> | Acit049   | L. Apoyo | II  | DQ230000 | 1  |
| <i>A.citrinellus</i> | Acit050   | L. Apoyo | II  | DQ230001 | 1  |
| <i>A.citrinellus</i> | Acit051†  | L. Apoyo | II  | DQ230002 | 1  |
| <i>A.citrinellus</i> | Acit052   | L. Apoyo | II  | DQ230003 | 1  |
| <i>A.citrinellus</i> | Acit053   | L. Apoyo | II  | DQ230004 | 1  |
| <i>A.citrinellus</i> | Acit054†  | L. Apoyo | II  | DQ230005 | 1  |
| <i>A.citrinellus</i> | Acit055†  | L. Apoyo | II  | DQ230006 | 1  |
| <i>A.citrinellus</i> | Acit056*  | L. Apoyo | III | DQ229978 | 1  |
| <i>A.citrinellus</i> | Acit057*† | L. Apoyo | III | DQ229980 | 1  |
| <i>A.citrinellus</i> | Acit058   | L. Apoyo | III | DQ229982 | 1  |
| <i>A.citrinellus</i> | Acit059†  | L. Apoyo | III | DQ229983 | 1  |
| <i>A.citrinellus</i> | Acit060   | L. Apoyo | III | DQ229984 | 1  |
| <i>A.citrinellus</i> | Acit061   | L. Apoyo | III | DQ229990 | 1  |
| <i>A.citrinellus</i> | Acit062   | L. Apoyo | III | DQ229991 | 1  |
| <i>A.citrinellus</i> | Acit063   | L. Apoyo | III | DQ229994 | 1  |
| <i>A.citrinellus</i> | Acit064   | L. Apoyo | III | DQ229995 | 1  |
| <i>A.citrinellus</i> | Acit065   | L. Apoyo | IV  | DQ229967 | 1  |
| <i>A.citrinellus</i> | Acit066   | L. Apoyo | IV  | DQ229968 | 1  |
| <i>A.citrinellus</i> | Acit067   | L. Apoyo | IV  | DQ229971 | 1  |
| <i>A.citrinellus</i> | Acit068   | L. Apoyo | IV  | DQ229976 | 1  |
| <i>A.citrinellus</i> | Acit069*† | L. Apoyo | IV  | DQ230022 | 1  |
| <i>A.citrinellus</i> | Acit070†  | L. Apoyo | IV  | DQ230023 | 1  |
| <i>A.citrinellus</i> | Acit071†  | L. Apoyo | IV  | DQ230024 | 1  |
| <i>A.citrinellus</i> | Acit072   | L. Apoyo | IV  | DQ230025 | 1  |
| <i>A.citrinellus</i> | Acit073†  | L. Apoyo | IV  | DQ230026 | 1  |
| <i>A.citrinellus</i> | Acit074†  | L. Apoyo | IV  | DQ230028 | 1  |
| <i>A.citrinellus</i> | Acit075*† | L. Apoyo | IV  | DQ230029 | 2  |
| <i>A.citrinellus</i> | Acit076†  | L. Apoyo | II  | DQ230031 | 3  |
| <i>A.citrinellus</i> | Acit077   | L. Apoyo | II  | DQ230032 | 3  |
| <i>A.citrinellus</i> | Acit078†  | L. Apoyo | II  | DQ230033 | 3  |
| <i>A.citrinellus</i> | Acit079†  | L. Apoyo | III | DQ230030 | 3  |
| <i>A.citrinellus</i> | Acit080   | L. Apoyo | IV  | DQ230034 | 3  |
| <i>A.citrinellus</i> | Acit081   | L. Apoyo | III | DQ230035 | 4  |
| <i>A.citrinellus</i> | Acit082   | L. Apoyo | III | DQ230036 | 5  |
| <i>A.citrinellus</i> | Acit083†  | L. Apoyo | IV  | DQ230037 | 5  |
| <i>A.citrinellus</i> | Acit084*† | L. Apoyo | IV  | DQ230038 | 6  |
| <i>A.citrinellus</i> | Acit085*  | L. Apoyo | IV  | DQ230039 | 7  |
| <i>A.citrinellus</i> | Acit086   | L. Apoyo | I   | DQ230042 | 8  |
| <i>A.citrinellus</i> | Acit087†  | L. Apoyo | II  | DQ230041 | 8  |
| <i>A.citrinellus</i> | Acit088†  | L. Apoyo | IV  | DQ230040 | 8  |
| <i>A.citrinellus</i> | Acit089   | L. Apoyo | I   | DQ230043 | 9  |
| <i>A.citrinellus</i> | Acit090†  | L. Apoyo | III | DQ230046 | 10 |
| <i>A.citrinellus</i> | Acit091†  | L. Apoyo | III | DQ230047 | 10 |
| <i>A.citrinellus</i> | Acit092*† | L. Apoyo | IV  | DQ230044 | 10 |
| <i>A.citrinellus</i> | Acit093*† | L. Apoyo | IV  | DQ230045 | 10 |
| <i>A.citrinellus</i> | Acit094*† | L. Apoyo | I   | DQ230050 | 11 |
| <i>A.citrinellus</i> | Acit095†  | L. Apoyo | II  | DQ230049 | 11 |
| <i>A.citrinellus</i> | Acit096†  | L. Apoyo | I   | DQ230062 | 13 |
| <i>A.citrinellus</i> | Acit097   | L. Apoyo | I   | DQ230063 | 13 |
| <i>A.citrinellus</i> | Acit098†  | L. Apoyo | II  | DQ230061 | 13 |

|                      |           |          |     |          |    |
|----------------------|-----------|----------|-----|----------|----|
| <i>A.citrinellus</i> | Acit099†  | L. Apoyo | III | DQ230059 | 13 |
| <i>A.citrinellus</i> | Acit100†  | L. Apoyo | III | DQ230060 | 13 |
| <i>A.citrinellus</i> | Acit101†  | L. Apoyo | IV  | DQ230064 | 13 |
| <i>A.citrinellus</i> | Acit102   | L. Apoyo | III | DQ230065 | 14 |
| <i>A.citrinellus</i> | Acit103*† | L. Apoyo | IV  | DQ230066 | 15 |
| <i>A.citrinellus</i> | Acit104†  | L. Apoyo | I   | DQ230068 | 16 |
| <i>A.citrinellus</i> | Acit105   | L. Apoyo | II  | DQ230067 | 16 |
| <i>A.citrinellus</i> | Acit106   | L. Apoyo | III | DQ230069 | 17 |
| <i>A.citrinellus</i> | Acit107†  | L. Apoyo | I   | DQ230070 | 18 |
| <i>A.citrinellus</i> | Acit108†  | L. Apoyo | IV  | DQ230071 | 18 |
| <i>A.citrinellus</i> | Acit109   | L. Apoyo | I   | DQ230072 | 19 |
| <i>A.citrinellus</i> | Acit110   | L. Apoyo | III | DQ230073 | 19 |
| <i>A.citrinellus</i> | Acit111†  | L. Apoyo | IV  | DQ230074 | 19 |
| <i>A.citrinellus</i> | Acit112†  | L. Apoyo | III | DQ230075 | 20 |
| <i>A.citrinellus</i> | Acit113   | L. Apoyo | I   | DQ230078 | 21 |
| <i>A.citrinellus</i> | Acit114†  | L. Apoyo | III | DQ230076 | 21 |
| <i>A.citrinellus</i> | Acit115*† | L. Apoyo | III | DQ230077 | 21 |
| <i>A.citrinellus</i> | Acit116*† | L. Apoyo | IV  | DQ230079 | 21 |
| <i>A.citrinellus</i> | Acit117   | L. Apoyo | IV  | DQ230080 | 21 |
| <i>A.citrinellus</i> | Acit118*  | L. Apoyo | I   | DQ230081 | 22 |

|                      |         |              |
|----------------------|---------|--------------|
| <i>A.citrinellus</i> | Nica119 | L. Nicaragua |
| <i>A.citrinellus</i> | Nica120 | L. Nicaragua |
| <i>A.citrinellus</i> | Nica121 | L. Nicaragua |
| <i>A.citrinellus</i> | Nica122 | L. Nicaragua |
| <i>A.citrinellus</i> | Nica123 | L. Nicaragua |
| <i>A.citrinellus</i> | Nica124 | L. Nicaragua |
| <i>A.citrinellus</i> | Nica125 | L. Nicaragua |
| <i>A.citrinellus</i> | Nica126 | L. Nicaragua |
| <i>A.citrinellus</i> | Nica127 | L. Nicaragua |
| <i>A.citrinellus</i> | Nica128 | L. Nicaragua |
| <i>A.citrinellus</i> | Nica129 | L. Nicaragua |
| <i>A.citrinellus</i> | Nica130 | L. Nicaragua |
| <i>A.citrinellus</i> | Nica131 | L. Nicaragua |
| <i>A.citrinellus</i> | Nica132 | L. Nicaragua |
| <i>A.citrinellus</i> | Nica133 | L. Nicaragua |
| <i>A.citrinellus</i> | Nica134 | L. Nicaragua |
| <i>A.citrinellus</i> | Nica135 | L. Nicaragua |
| <i>A.citrinellus</i> | Nica136 | L. Nicaragua |
| <i>A.citrinellus</i> | Nica137 | L. Nicaragua |
| <i>A.citrinellus</i> | Nica138 | L. Nicaragua |
| <i>A.citrinellus</i> | Nica139 | L. Nicaragua |
| <i>A.citrinellus</i> | Nica140 | L. Nicaragua |
| <i>A.citrinellus</i> | Nica141 | L. Nicaragua |
| <i>A.citrinellus</i> | Nica142 | L. Nicaragua |
| <i>A.citrinellus</i> | Nica143 | L. Nicaragua |
| <i>A.citrinellus</i> | Nica144 | L. Nicaragua |
| <i>A.citrinellus</i> | Nica145 | L. Nicaragua |
| <i>A.citrinellus</i> | Nica146 | L. Nicaragua |
| <i>A.citrinellus</i> | Nica147 | L. Nicaragua |
| <i>A.citrinellus</i> | Nica148 | L. Nicaragua |
| <i>A.citrinellus</i> | Nica149 | L. Nicaragua |
| <i>A.citrinellus</i> | Nica150 | L. Nicaragua |
| <i>A.citrinellus</i> | Nica151 | L. Nicaragua |
| <i>A.citrinellus</i> | Nica152 | L. Nicaragua |
| <i>A.citrinellus</i> | Nica153 | L. Nicaragua |
| <i>A.citrinellus</i> | Nica154 | L. Nicaragua |







|                      |         |              |
|----------------------|---------|--------------|
| <i>A.citrinellus</i> | Nica332 | L. Nicaragua |
| <i>A.citrinellus</i> | Nica333 | L. Nicaragua |
| <i>A.citrinellus</i> | Nica334 | L. Nicaragua |
| <i>A.citrinellus</i> | Nica335 | L. Nicaragua |
| <i>A.citrinellus</i> | Nica336 | L. Nicaragua |
| <i>A.citrinellus</i> | Nica337 | L. Nicaragua |
| <i>A.citrinellus</i> | Nica338 | L. Nicaragua |
| <i>A.citrinellus</i> | Nica339 | L. Nicaragua |
| <i>A.citrinellus</i> | Mana340 | L. Managua   |
| <i>A.citrinellus</i> | Mana341 | L. Managua   |
| <i>A.citrinellus</i> | Mana342 | L. Managua   |
| <i>A.citrinellus</i> | Mana343 | L. Managua   |
| <i>A.citrinellus</i> | Mana344 | L. Managua   |
| <i>A.citrinellus</i> | Mana345 | L. Managua   |
| <i>A.citrinellus</i> | Mana346 | L. Managua   |
| <i>A.citrinellus</i> | Mana347 | L. Managua   |
| <i>A.citrinellus</i> | Mana348 | L. Managua   |
| <i>A.citrinellus</i> | Mana349 | L. Managua   |
| <i>A.citrinellus</i> | Mana350 | L. Managua   |
| <i>A.citrinellus</i> | Mana351 | L. Managua   |
| <i>A.citrinellus</i> | Mana352 | L. Managua   |
| <i>A.citrinellus</i> | Mana353 | L. Managua   |
| <i>A.citrinellus</i> | Mana354 | L. Managua   |
| <i>A.citrinellus</i> | Mana355 | L. Managua   |
| <i>A.citrinellus</i> | Mana356 | L. Managua   |
| <i>A.citrinellus</i> | Mana357 | L. Managua   |
| <i>A.citrinellus</i> | Mana358 | L. Managua   |
| <i>A.citrinellus</i> | Mana359 | L. Managua   |
| <i>A.citrinellus</i> | Mana360 | L. Managua   |
| <i>A.citrinellus</i> | Mana361 | L. Managua   |
| <i>A.citrinellus</i> | Mana362 | L. Managua   |
| <i>A.citrinellus</i> | Mana363 | L. Managua   |
| <i>A.citrinellus</i> | Mana364 | L. Managua   |
| <i>A.citrinellus</i> | Mana365 | L. Managua   |
| <i>A.citrinellus</i> | Mana366 | L. Managua   |
| <i>A.citrinellus</i> | Mana367 | L. Managua   |
| <i>A.citrinellus</i> | Mana368 | L. Managua   |
| <i>A.citrinellus</i> | Mana369 | L. Managua   |
| <i>A.citrinellus</i> | Mana370 | L. Managua   |
| <i>A.citrinellus</i> | Mana371 | L. Managua   |
| <i>A.citrinellus</i> | Mana372 | L. Managua   |
| <i>A.citrinellus</i> | Mana373 | L. Managua   |
| <i>A.citrinellus</i> | Mana374 | L. Managua   |
| <i>A.citrinellus</i> | Mana375 | L. Managua   |
| <i>A.citrinellus</i> | Mana376 | L. Managua   |
| <i>A.citrinellus</i> | Mana377 | L. Managua   |
| <i>A.citrinellus</i> | Mana378 | L. Managua   |
| <i>A.citrinellus</i> | Mana379 | L. Managua   |
| <i>A.citrinellus</i> | Mana380 | L. Managua   |
| <i>A.citrinellus</i> | Mana381 | L. Managua   |
| <i>A.citrinellus</i> | Mana382 | L. Managua   |
| <i>A.citrinellus</i> | Mana383 | L. Managua   |
| <i>A.citrinellus</i> | Mana384 | L. Managua   |
| <i>A.citrinellus</i> | Mana385 | L. Managua   |
| <i>A.citrinellus</i> | Mana386 | L. Managua   |
| <i>A.citrinellus</i> | Mana387 | L. Managua   |
| <i>A.citrinellus</i> | Mana388 | L. Managua   |
| <i>A.citrinellus</i> | Mana389 | L. Managua   |
| <i>A.citrinellus</i> | Mana390 | L. Managua   |

|                      |         |            |
|----------------------|---------|------------|
| <i>A.citrinellus</i> | Mana391 | L. Managua |
| <i>A.citrinellus</i> | Mana392 | L. Managua |
| <i>A.citrinellus</i> | Mana393 | L. Managua |
| <i>A.citrinellus</i> | Mana394 | L. Managua |
| <i>A.citrinellus</i> | Mana395 | L. Managua |
| <i>A.citrinellus</i> | Mana396 | L. Managua |
| <i>A.citrinellus</i> | Mana397 | L. Managua |
| <i>A.citrinellus</i> | Mana398 | L. Managua |
| <i>A.citrinellus</i> | Mana399 | L. Managua |
| <i>A.citrinellus</i> | Mana400 | L. Managua |
| <i>A.citrinellus</i> | Mana401 | L. Managua |
| <i>A.citrinellus</i> | Mana402 | L. Managua |
| <i>A.citrinellus</i> | Mana403 | L. Managua |
| <i>A.citrinellus</i> | Mana404 | L. Managua |
| <i>A.citrinellus</i> | Mana405 | L. Managua |
| <i>A.citrinellus</i> | Mana406 | L. Managua |
| <i>A.citrinellus</i> | Mana407 | L. Managua |
| <i>A.citrinellus</i> | Mana408 | L. Managua |
| <i>A.citrinellus</i> | Mana409 | L. Managua |
| <i>A.citrinellus</i> | Mana410 | L. Managua |
| <i>A.citrinellus</i> | Mana411 | L. Managua |
| <i>A.citrinellus</i> | Mana412 | L. Managua |
| <i>A.citrinellus</i> | Mana413 | L. Managua |
| <i>A.citrinellus</i> | Mana414 | L. Managua |
| <i>A.citrinellus</i> | Mana415 | L. Managua |
| <i>A.citrinellus</i> | Mana416 | L. Managua |
| <i>A.citrinellus</i> | Mana417 | L. Managua |
| <i>A.citrinellus</i> | Mana418 | L. Managua |
| <i>A.citrinellus</i> | Mana419 | L. Managua |
| <i>A.citrinellus</i> | Mana420 | L. Managua |
| <i>A.citrinellus</i> | Mana421 | L. Managua |
| <i>A.citrinellus</i> | Mana422 | L. Managua |
| <i>A.citrinellus</i> | Mana423 | L. Managua |
| <i>A.citrinellus</i> | Mana424 | L. Managua |
| <i>A.citrinellus</i> | Mana425 | L. Managua |
| <i>A.citrinellus</i> | Mana426 | L. Managua |
| <i>A.citrinellus</i> | Mana427 | L. Managua |
| <i>A.citrinellus</i> | Mana428 | L. Managua |
| <i>A.citrinellus</i> | Mana429 | L. Managua |
| <i>A.citrinellus</i> | Mana430 | L. Managua |
| <i>A.citrinellus</i> | Tism431 | Tisma Pond |
| <i>A.citrinellus</i> | Tism432 | Tisma Pond |
| <i>A.citrinellus</i> | Tism433 | Tisma Pond |
| <i>A.citrinellus</i> | Tism434 | Tisma Pond |
| <i>A.citrinellus</i> | Tism435 | Tisma Pond |
| <i>A.citrinellus</i> | Tism436 | Tisma Pond |
| <i>A.citrinellus</i> | Tism437 | Tisma Pond |
| <i>A.citrinellus</i> | Tism438 | Tisma Pond |
| <i>A.citrinellus</i> | Tism439 | Tisma Pond |
| <i>A.citrinellus</i> | Tism440 | Tisma Pond |
| <i>A.citrinellus</i> | Tism441 | Tisma Pond |
| <i>A.citrinellus</i> | Tism442 | Tisma Pond |
| <i>A.citrinellus</i> | Tism443 | Tisma Pond |
| <i>A.citrinellus</i> | Tism444 | Tisma Pond |
| <i>A.citrinellus</i> | Tism445 | Tisma Pond |
| <i>A.citrinellus</i> | Xilo446 | L. Xiloá   |
| <i>A.citrinellus</i> | Xilo447 | L. Xiloá   |
| <i>A.citrinellus</i> | Xilo448 | L. Xiloá   |
| <i>A.citrinellus</i> | Xilo449 | L. Xiloá   |

|                      |         |          |
|----------------------|---------|----------|
| <i>A.citrinellus</i> | Xilo450 | L. Xiloá |
| <i>A.citrinellus</i> | Xilo451 | L. Xiloá |
| <i>A.citrinellus</i> | Xilo452 | L. Xiloá |
| <i>A.citrinellus</i> | Xilo453 | L. Xiloá |
| <i>A.citrinellus</i> | Xilo454 | L. Xiloá |
| <i>A.citrinellus</i> | Xilo455 | L. Xiloá |
| <i>A.citrinellus</i> | Xilo456 | L. Xiloá |
| <i>A.citrinellus</i> | Xilo457 | L. Xiloá |
| <i>A.citrinellus</i> | Xilo458 | L. Xiloá |
| <i>A.citrinellus</i> | Xilo459 | L. Xiloá |
| <i>A.citrinellus</i> | Xilo460 | L. Xiloá |
| <i>A.citrinellus</i> | Xilo461 | L. Xiloá |
| <i>A.citrinellus</i> | Xilo462 | L. Xiloá |
| <i>A.citrinellus</i> | Xilo463 | L. Xiloá |
| <i>A.citrinellus</i> | Xilo464 | L. Xiloá |
| <i>A.citrinellus</i> | Xilo465 | L. Xiloá |
| <i>A.citrinellus</i> | Xilo466 | L. Xiloá |
| <i>A.citrinellus</i> | Xilo467 | L. Xiloá |
| <i>A.citrinellus</i> | Xilo468 | L. Xiloá |
| <i>A.citrinellus</i> | Xilo469 | L. Xiloá |
| <i>A.citrinellus</i> | Xilo470 | L. Xiloá |
| <i>A.citrinellus</i> | Xilo471 | L. Xiloá |
| <i>A.citrinellus</i> | Xilo472 | L. Xiloá |
| <i>A.citrinellus</i> | Xilo473 | L. Xiloá |
| <i>A.citrinellus</i> | Xilo474 | L. Xiloá |
| <i>A.citrinellus</i> | Xilo475 | L. Xiloá |
| <i>A.citrinellus</i> | Xilo476 | L. Xiloá |
| <i>A.citrinellus</i> | Xilo477 | L. Xiloá |
| <i>A.citrinellus</i> | Xilo478 | L. Xiloá |
| <i>A.citrinellus</i> | Xilo479 | L. Xiloá |
| <i>A.citrinellus</i> | Xilo480 | L. Xiloá |
| <i>A.citrinellus</i> | Xilo481 | L. Xiloá |
| <i>A.citrinellus</i> | Xilo482 | L. Xiloá |
| <i>A.citrinellus</i> | Xilo483 | L. Xiloá |
| <i>A.citrinellus</i> | Xilo484 | L. Xiloá |
| <i>A.citrinellus</i> | Xilo485 | L. Xiloá |
| <i>A.citrinellus</i> | Xilo486 | L. Xiloá |
| <i>A.citrinellus</i> | Xilo487 | L. Xiloá |
| <i>A.citrinellus</i> | Xilo488 | L. Xiloá |
| <i>A.citrinellus</i> | Xilo489 | L. Xiloá |
| <i>A.citrinellus</i> | Xilo490 | L. Xiloá |
| <i>A.citrinellus</i> | Xilo491 | L. Xiloá |
| <i>A.citrinellus</i> | Xilo492 | L. Xiloá |
| <i>A.citrinellus</i> | Xilo493 | L. Xiloá |
| <i>A.citrinellus</i> | Xilo494 | L. Xiloá |
| <i>A.citrinellus</i> | Xilo495 | L. Xiloá |
| <i>A.citrinellus</i> | Xilo496 | L. Xiloá |
| <i>A.citrinellus</i> | Xilo497 | L. Xiloá |
| <i>A.citrinellus</i> | Xilo498 | L. Xiloá |
| <i>A.citrinellus</i> | Xilo499 | L. Xiloá |
| <i>A.citrinellus</i> | Xilo500 | L. Xiloá |
| <i>A.citrinellus</i> | Xilo501 | L. Xiloá |
| <i>A.citrinellus</i> | Xilo502 | L. Xiloá |
| <i>A.citrinellus</i> | Xilo503 | L. Xiloá |
| <i>A.citrinellus</i> | Xilo504 | L. Xiloá |
| <i>A.citrinellus</i> | Xilo505 | L. Xiloá |
| <i>A.citrinellus</i> | Xilo506 | L. Xiloá |
| <i>A.citrinellus</i> | Xilo507 | L. Xiloá |
| <i>A.citrinellus</i> | Xilo508 | L. Xiloá |

|                      |         |           |
|----------------------|---------|-----------|
| <i>A.citrinellus</i> | Xilo509 | L. Xiloá  |
| <i>A.citrinellus</i> | Xilo510 | L. Xiloá  |
| <i>A.citrinellus</i> | Xilo511 | L. Xiloá  |
| <i>A.citrinellus</i> | Xilo512 | L. Xiloá  |
| <i>A.citrinellus</i> | Xilo513 | L. Xiloá  |
| <i>A.citrinellus</i> | Xilo514 | L. Xiloá  |
| <i>A.citrinellus</i> | Xilo515 | L. Xiloá  |
| <i>A.citrinellus</i> | Xilo516 | L. Xiloá  |
| <i>A.citrinellus</i> | Xilo517 | L. Xiloá  |
| <i>A.citrinellus</i> | Xilo518 | L. Xiloá  |
| <i>A.citrinellus</i> | Xilo519 | L. Xiloá  |
| <i>A.citrinellus</i> | Xilo520 | L. Xiloá  |
| <i>A.citrinellus</i> | Xilo521 | L. Xiloá  |
| <i>A.citrinellus</i> | Masa522 | L. Masaya |
| <i>A.citrinellus</i> | Masa523 | L. Masaya |
| <i>A.citrinellus</i> | Masa524 | L. Masaya |
| <i>A.citrinellus</i> | Masa525 | L. Masaya |
| <i>A.citrinellus</i> | Masa526 | L. Masaya |
| <i>A.citrinellus</i> | Masa527 | L. Masaya |
| <i>A.citrinellus</i> | Masa528 | L. Masaya |
| <i>A.citrinellus</i> | Masa529 | L. Masaya |
| <i>A.citrinellus</i> | Masa530 | L. Masaya |
| <i>A.citrinellus</i> | Masa531 | L. Masaya |
| <i>A.citrinellus</i> | Masa532 | L. Masaya |
| <i>A.citrinellus</i> | Masa533 | L. Masaya |
| <i>A.citrinellus</i> | Masa534 | L. Masaya |
| <i>A.citrinellus</i> | Masa535 | L. Masaya |
| <i>A.citrinellus</i> | Masa536 | L. Masaya |
| <i>A.citrinellus</i> | Masa537 | L. Masaya |
| <i>A.citrinellus</i> | Masa538 | L. Masaya |
| <i>A.citrinellus</i> | Masa539 | L. Masaya |
| <i>A.citrinellus</i> | Masa540 | L. Masaya |
| <i>A.citrinellus</i> | Masa541 | L. Masaya |
| <i>A.citrinellus</i> | Masa542 | L. Masaya |
| <i>A.citrinellus</i> | Masa543 | L. Masaya |
| <i>A.citrinellus</i> | Masa544 | L. Masaya |
| <i>A.citrinellus</i> | Masa545 | L. Masaya |
| <i>A.citrinellus</i> | Masa546 | L. Masaya |
| <i>A.citrinellus</i> | Masa547 | L. Masaya |
| <i>A.citrinellus</i> | Masa548 | L. Masaya |
| <i>A.citrinellus</i> | Masa549 | L. Masaya |
| <i>A.citrinellus</i> | Masa550 | L. Masaya |
| <i>A.citrinellus</i> | Masa551 | L. Masaya |
| <i>A.citrinellus</i> | Masa552 | L. Masaya |
| <i>A.citrinellus</i> | Masa553 | L. Masaya |
| <i>A.citrinellus</i> | Masa554 | L. Masaya |
| <i>A.citrinellus</i> | Masa555 | L. Masaya |
| <i>A.citrinellus</i> | Masa556 | L. Masaya |
| <i>A.citrinellus</i> | Masa557 | L. Masaya |
| <i>A.citrinellus</i> | Masa558 | L. Masaya |
| <i>A.citrinellus</i> | Masa559 | L. Masaya |
| <i>A.citrinellus</i> | Masa560 | L. Masaya |
| <i>A.citrinellus</i> | Masa561 | L. Masaya |
| <i>A.citrinellus</i> | Masa562 | L. Masaya |
| <i>A.citrinellus</i> | Masa563 | L. Masaya |
| <i>A.citrinellus</i> | Masa564 | L. Masaya |
| <i>A.citrinellus</i> | Masa565 | L. Masaya |
| <i>A.citrinellus</i> | Masa566 | L. Masaya |
| <i>A.citrinellus</i> | Masa567 | L. Masaya |

|                      |         |           |
|----------------------|---------|-----------|
| <i>A.citrinellus</i> | Masa568 | L. Masaya |
| <i>A.citrinellus</i> | Masa569 | L. Masaya |
| <i>A.citrinellus</i> | Masa570 | L. Masaya |
| <i>A.citrinellus</i> | Masa571 | L. Masaya |
| <i>A.citrinellus</i> | Masa572 | L. Masaya |
| <i>A.citrinellus</i> | Masa573 | L. Masaya |
| <i>A.citrinellus</i> | Masa574 | L. Masaya |
| <i>A.citrinellus</i> | Masa575 | L. Masaya |
| <i>A.citrinellus</i> | Masa576 | L. Masaya |
| <i>A.citrinellus</i> | Masa577 | L. Masaya |
| <i>A.citrinellus</i> | Masa578 | L. Masaya |
| <i>A.citrinellus</i> | Masa579 | L. Masaya |
| <i>A.citrinellus</i> | Masa580 | L. Masaya |
| <i>A.citrinellus</i> | Masa581 | L. Masaya |
| <i>A.citrinellus</i> | Masa582 | L. Masaya |
| <i>A.citrinellus</i> | Masa583 | L. Masaya |
| <i>A.citrinellus</i> | Masa584 | L. Masaya |
| <i>A.citrinellus</i> | Masa585 | L. Masaya |
| <i>A.citrinellus</i> | Masa586 | L. Masaya |
| <i>A.citrinellus</i> | Masa587 | L. Masaya |
| <i>A.citrinellus</i> | Masa588 | L. Masaya |
| <i>A.citrinellus</i> | Masa589 | L. Masaya |
| <i>A.citrinellus</i> | Masa590 | L. Masaya |
| <i>A.citrinellus</i> | Masa591 | L. Masaya |
| <i>A.citrinellus</i> | Masa592 | L. Masaya |
| <i>A.citrinellus</i> | Masa593 | L. Masaya |
| <i>A.citrinellus</i> | Masa594 | L. Masaya |
| <i>A.citrinellus</i> | Masa595 | L. Masaya |
| <i>A.citrinellus</i> | Masa596 | L. Masaya |
| <i>A.citrinellus</i> | Masa597 | L. Masaya |
| <i>A.citrinellus</i> | Masa598 | L. Masaya |
| <i>A.citrinellus</i> | Masa599 | L. Masaya |
| <i>A.citrinellus</i> | Masa600 | L. Masaya |
| <i>A.citrinellus</i> | Masa601 | L. Masaya |
| <i>A.citrinellus</i> | Masa602 | L. Masaya |
| <i>A.citrinellus</i> | Masa603 | L. Masaya |
| <i>A.citrinellus</i> | Masa604 | L. Masaya |
| <i>A.citrinellus</i> | Masa605 | L. Masaya |
| <i>A.citrinellus</i> | Masa606 | L. Masaya |
| <i>A.citrinellus</i> | Masa607 | L. Masaya |
| <i>A.citrinellus</i> | Masa608 | L. Masaya |
| <i>A.citrinellus</i> | Masa609 | L. Masaya |
| <i>A.citrinellus</i> | Masa610 | L. Masaya |
| <i>A.citrinellus</i> | Masa611 | L. Masaya |
| <i>A.citrinellus</i> | Masa612 | L. Masaya |
| <i>A.citrinellus</i> | Masa613 | L. Masaya |
| <i>A.citrinellus</i> | Masa614 | L. Masaya |
| <i>A.citrinellus</i> | Masa615 | L. Masaya |
| <i>A.citrinellus</i> | Masa616 | L. Masaya |
| <i>A.citrinellus</i> | Masa617 | L. Masaya |
| <i>A.citrinellus</i> | Masa618 | L. Masaya |
